# Supplementary material
Source: publisher figshare collection journal article supplement (https://gsapubs.figshare.com/ndownloader/files/40027234)
Supplement: Supplementary file 1 [file 40027234]

## Sheet: Major & Trace elements
						Table 3. Bulk–rock major and trace elements composition of selected granodiorite samples.
Sample	Sa-1	Sa-2	Sa-3	Sa-4	Sa-5	Sa-6	Sa-7	Sa-8	Sa-9	Sa-10	Sa-11	Sa-12	Sa-13	Sa-14	Sa-15	Sa-16	Sa-17	Sa-18	Sa-19	Sa-20
SiO2 (%)	62.05	60.89	59.6	62.88	67.49	68.4	64.39	61.5	59.67	62.28	65.5	64.06	64.1	63.7	60.13	67.51	61.8	62.88	65.1	66.38
Al2O3	16.62	16.4	16.7	16.67	15.62	15.8	15.67	14.48	16.54	16.33	15.45	15.36	15.72	16.15	17.15	16.85	15.7	17.22	16.6	15.05
Fe2O3	5.19	6.26	7.66	4.4	3.82	3.05	5.26	7.71	6.03	5.62	5.07	5.7	4.97	6.03	6.36	5.73	7.66	4.89	3.89	4.54
MgO	2.56	2.69	2.48	2.26	1.26	1.1	1.9	2.47	3.34	3.02	2.05	2.07	2.19	1.78	2.89	0.48	2.41	1.61	1.52	1.17
CaO	3.85	5.2	5.89	3.92	3.65	3.27	4.75	4.3	4.43	3.73	3.38	4.79	4.56	4.81	5.75	1.36	5.19	4.37	4.84	4.33
Na2O	3.95	4.04	3.59	4.17	4.19	3.06	4.1	3.65	3.6	3.51	3.64	3.75	3.96	3.49	3.75	3.76	3.44	4.12	3.47	4.36
K2O	2.94	1.56	2.31	2.9	2.15	4.19	2.04	2.3	3.27	3.01	3.46	3.24	2.46	2.73	1.54	2.82	2.38	2.44	2.9	2.79
TiO2	0.88	0.75	0.71	0.76	0.34	0.32	0.37	0.71	1.03	0.9	0.51	0.35	0.56	0.57	0.61	0.56	0.71	0.4	0.49	0.45
P2O5	0.29	0.2	0.2	0.25	0.11	0.09	0.16	0.14	0.37	0.34	0.15	0.09	0.12	0.19	0.13	0.09	0.22	0.16	0.15	0.1
MnO	0.08	0.11	0.14	0.07	0.1	0.07	0.13	0.22	0.08	0.09	0.13	0.06	0.05	0.15	0.11	0.11	0.14	0.06	0.05	0.07
Cr2O3	0.01	0.02	0.01	0.01	0.02	0.01	0.01	0.01	0.02	0.01	0.01	0.02	0.02	0.01	0.01	0.02	0.01	0.01	0.01	0.01
LOI	0.93	1.33	0.41	0.8	0.81	0.58	1.28	2.12	1.23	0.89	0.62	0.28	1.24	0.37	1.58	0.72	0.29	1.73	1.01	0.74
Total	99.35	99.45	99.7	99.09	99.56	99.94	100.06	99.61	99.61	99.73	99.97	99.77	99.95	99.98	100.01	100.01	99.95	99.89	100.03	99.99
Rb (ppm)	179	59	159	142	24	125	87	151	86	76	124	79	137	60	143	155	99	61	153	24
Cs	0.61	1.08	2.34	1.12	1.57	1.47	1.05	0.4	0.85	1.06	1.49	0.24	0.22	1.22	0.21	0.92	1.88	0.45	0.4	1.21
Ba	254	126	148	265	184	208	155	216	148	365	301	101	217	675	196	283	305	294	259	314
Sr	384	323	424	325	247	248	381	208	237	325	347	326	282	349	422	312	394	404	353	423
Ta	0.4	0.4	0.5	0.3	0.4	0.7	0.1	0.2	0.3	0.2	0.5	0.4	0.2	0.5	0.2	0.4	0.4	0.2	0.5	0.3
Th	6.06	5.94	5.11	10.16	5.18	8.42	1.87	4.72	4.72	4.59	5.89	4.23	5.12	5.55	2.58	8.14	4.62	1.84	5.91	13
U	1.35	1.32	1.23	1.34	1.45	1.78	0.52	1.32	1.09	1.45	1.3	0.77	1.19	1.43	0.77	1.06	1.47	0.54	1.56	9
La	36.61	19.6	15.3	82.91	12.8	19.7	11.8	10.6	38.6	27.95	16.8	8.8	9.8	24.2	9.6	19.55	16.5	9.3	16	29
Ce	94.1	46.5	30.8	155.7	26.7	34.9	25.1	25.3	98.34	64.92	32.6	18.3	24.6	45.7	24	42.1	33.3	18.4	31.6	42
Pr	9.13	6.13	3.85	14.47	3.27	3.9	3.17	3.35	9.99	8.15	4.07	2.15	3.74	5.24	3.4	4.86	4.16	2.5	3.85	4.52
Nd	29.98	25.8	15.4	39.36	13.1	14.2	13.3	14.7	40.15	34.44	16.2	8.6	17.4	19.3	15.7	17.7	16.8	11.7	14.9	21
Sm	5.65	5.65	3.53	6.5	2.85	2.84	3.04	3.76	7.07	6.93	3.7	2.03	4.8	3.76	3.87	3.16	4.02	2.84	3.21	3.46
Eu	1.38	1.21	0.94	1.48	0.71	0.6	0.85	0.83	1.88	1.59	0.91	0.7	1.02	0.95	1.05	0.5	1.04	0.83	0.88	0.87
Gd	4.3	5.21	3.87	4.76	3.12	2.99	2.8	4.45	5.36	5.67	4.15	2.06	4.83	3.91	4.15	2.29	4.4	2.87	3.65	3.98
Tb	0.35	0.8	0.62	0.52	0.47	0.46	0.41	0.77	0.69	0.83	0.64	0.37	0.73	0.56	0.67	0.24	0.69	0.51	0.55	0.58
Dy	2.64	4.44	4	2.41	2.75	2.8	2.14	4.48	3.47	4.64	3.88	2.03	4.14	3.48	3.7	1.12	4.44	2.59	3.26	3.34
Ho	0.46	0.9	0.8	0.41	0.59	0.6	0.44	0.97	0.64	0.9	0.83	0.44	0.9	0.71	0.76	0.15	0.94	0.59	0.69	0.71
Er	1.3	2.46	2.45	1.15	1.77	1.89	1.33	2.88	1.62	2.53	2.41	1.38	2.67	2.12	2.35	0.44	2.76	1.6	2.12	2.03
Tm	0.13	0.41	0.34	0.15	0.3	0.29	0.23	0.47	0.25	0.41	0.37	0.22	0.44	0.32	0.37	0.39	0.42	0.29	0.32	0.33
Yb	0.97	2.58	2.39	0.84	2.02	2.06	1.63	3.09	1.16	2.35	2.44	1.62	2.94	2.14	2.56	0.32	2.68	2.02	2.16	2.08
Lu	0.38	0.4	0.4	0.34	0.33	0.34	0.23	0.44	0.38	0.32	0.37	0.25	0.42	0.36	0.37	0.36	0.47	0.32	0.33	0.35
Hf	4.2	5.6	3.5	3.8	3.9	3.8	2.4	4.7	4.6	3.6	3.8	3	5.1	3.6	5	3.9	4.2	2.9	4.1	10
Nb	19	16	15	18	21	14	18	18	12	21	19	18	14	15	12	13	26	21	11	21
Zr	166	204	119	164	136	124	93	168	226	193	134	111	180	121	190	116	145	107	145	177
Y	16	16	19	15	12	10	10	12	21	18	12	13	14	17	13	18	17	16	13	12
